# Supplementary material for: The Antivirulence Activity of Umbelliferone and Its Protective Effect against A. hydrophila-Infected Grass Carp
Source: MDPI journal article supplement (doi:10.3390/ijms231911119), 2022-09-22
Supplement: s1 [file s1]

**Table S1. Overview of sequencing data**

| Sample name | Raw reads | Clean reads | clean bases | Mapped ratio (%) | Q30(%) |
|-------------|-----------|-------------|-------------|------------------|--------|
| C1          | 7569420   | 7540054     | 1.1G        | 93.80%           | 95.44  |
| C2          | 7997372   | 7944600     | 1.2G        | 94%              | 95.41  |
| C3          | 7749420   | 7697060     | 1.2G        | 94.83            | 95.16  |
| T1          | 7575978   | 7521680     | 1.1G        | 94.93            | 95.03  |
| T2          | 8324810   | 8246466     | 1.2G        | 95.38            | 95.05  |
| T3          | 7883550   | 7820140     | 1.2G        | 95.58            | 95.41  |
