# Supplementary material for: The Antivirulence Activity of Umbelliferone and Its Protective Effect against A. hydrophila-Infected Grass Carp
Source: MDPI journal article supplement (doi:10.3390/ijms231911119), 2022-09-22
Supplement: s1 [file s1]

**Table S4. qPCR primers**

| <b>Primer</b> | <b>Sequence (5'-3' )</b>     | <b>PCR product length (bp)</b> |
|---------------|------------------------------|--------------------------------|
| <i>tssK</i>   | F: AGGATTACCTGGGCTTTGGC      | 101                            |
|               | R: GGTCGGCAGCACATCGTCA       |                                |
| <i>exeN</i>   | F: GCTGATTGCCGTGCTGTTTC      | 169                            |
|               | R: CGACTCGCTGGCGTATTGC       |                                |
| <i>ampC</i>   | F: ATGAAACAGACCAGAGCCTTGC    | 199                            |
|               | R: CCAGCCCGTAGTTGAAGTAGTG    |                                |
| <i>tsgA</i>   | F: CACCTACGGTTACGGCTTTG      | 96                             |
|               | R: GAGACGTTCTTGCTCGATGC      |                                |
| <i>vgrG</i>   | F: CAGTCTTGGCAACGATCATCT     | 80                             |
|               | R: TATCCACGGTCAGCGAGTAG      |                                |
| <i>emrD</i>   | F: CGCCTTGGCATCGTCTTC        | 144                            |
|               | R: GGAGGTAGCGGTCGGATAGA      |                                |
| <i>pspG</i>   | F: GGCGTCTTCGTGCTGTT         | 130                            |
|               | R: GGTAGGTATTGGCCTGCTT       |                                |
| <i>amoA</i>   | F: ACTACCCCTATGCCACCCG       | 164                            |
|               | R: GTCGTGCCAGTCGTCATCG       |                                |
| <i>apoA</i>   | F: GCTGGAAGGCAAGGACGAGGTAAC  | 205                            |
|               | R: AACACGAGCAGAAGCAGGCACATAA |                                |
